# Supplementary material
Source: Springer Nature journal article supplement (https://www.springermedizin.de/resource/supplementary/12913_2012_2375_MOESM2_ESM.pdf/9530548)

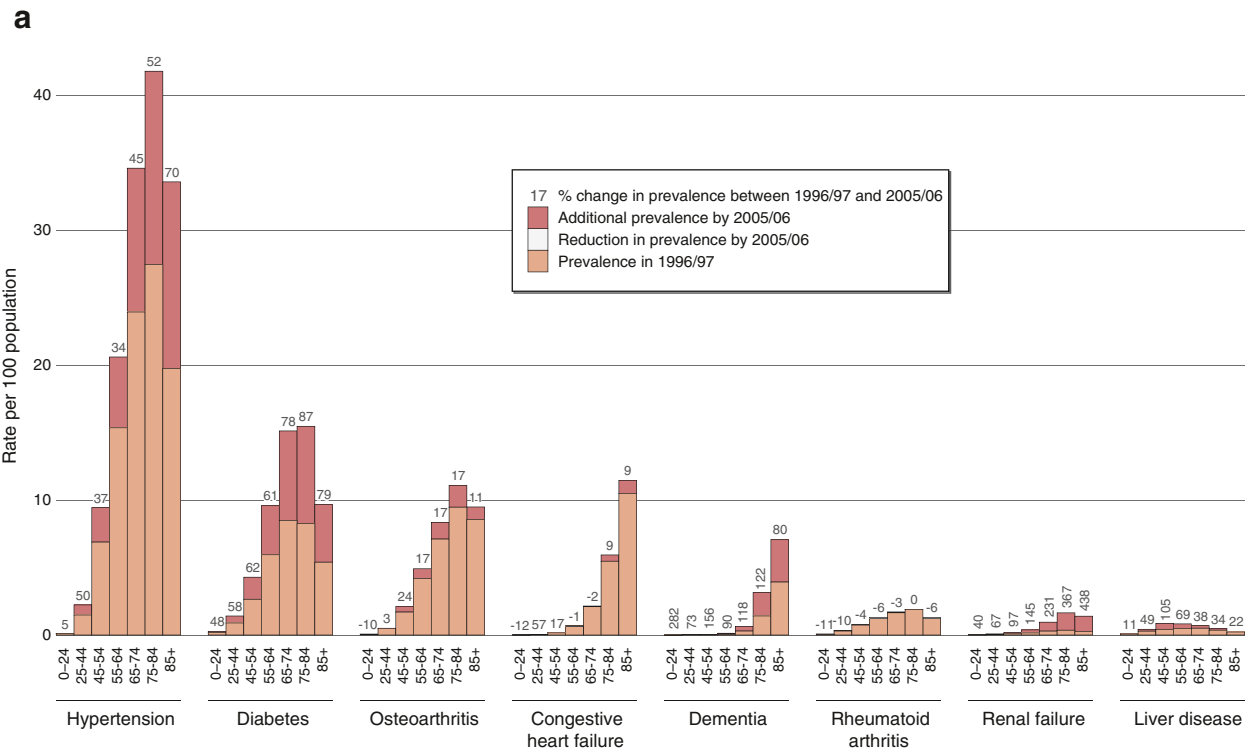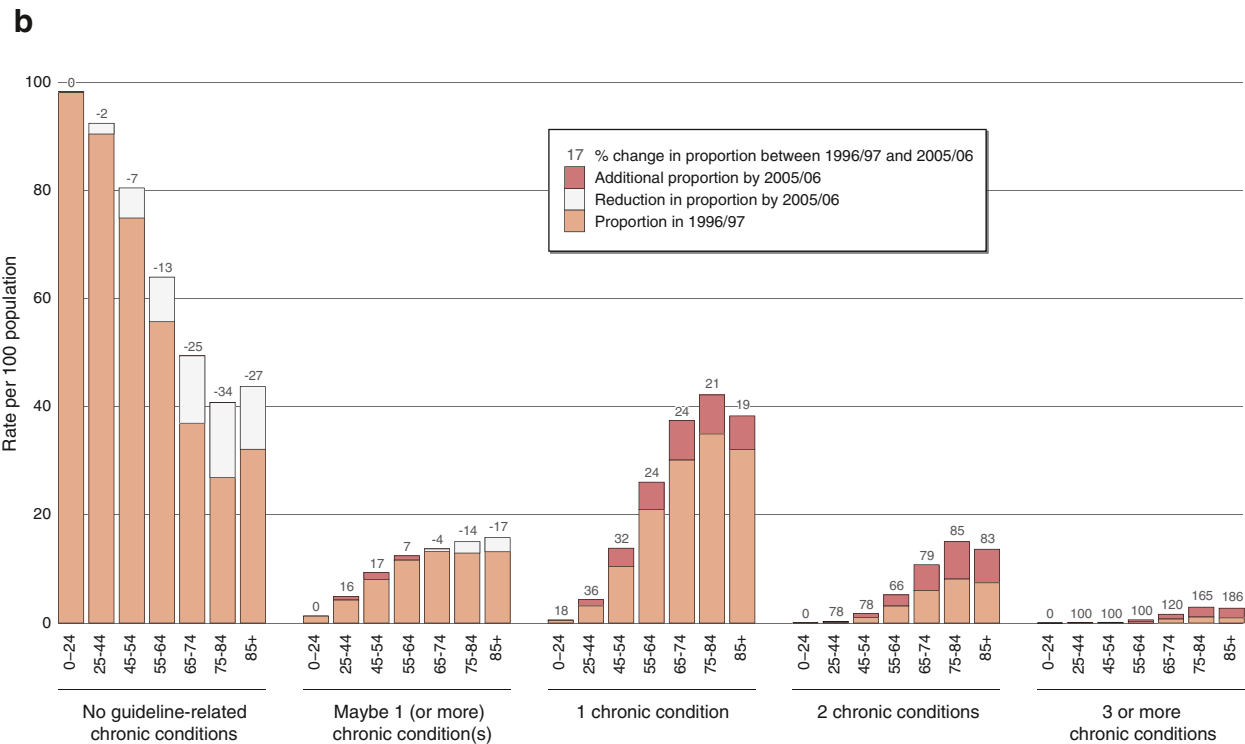

Supplement: MOESM2 [file 9530548]
